# Supplementary material
Source: publisher site journal article supplement (https://www.dovepress.com/article/251547)

## Supplementary Material

### Treatment efficacy and clinical effectiveness of EEG neurofeedback as a personalized and multimodal treatment in ADHD: a critical review

Miguel Garcia Pimenta, Trevor Brown, Martijn Arns, Stefanie Enriquez-Geppert

Figure S-1. Preferred Reporting Items for Systematic Reviews and Meta-Analyses (PRISMA) flow diagram of study selection (final search: 23<sup>rd</sup> of December 2020). See supplement for list of excluded articles with reason for exclusion.

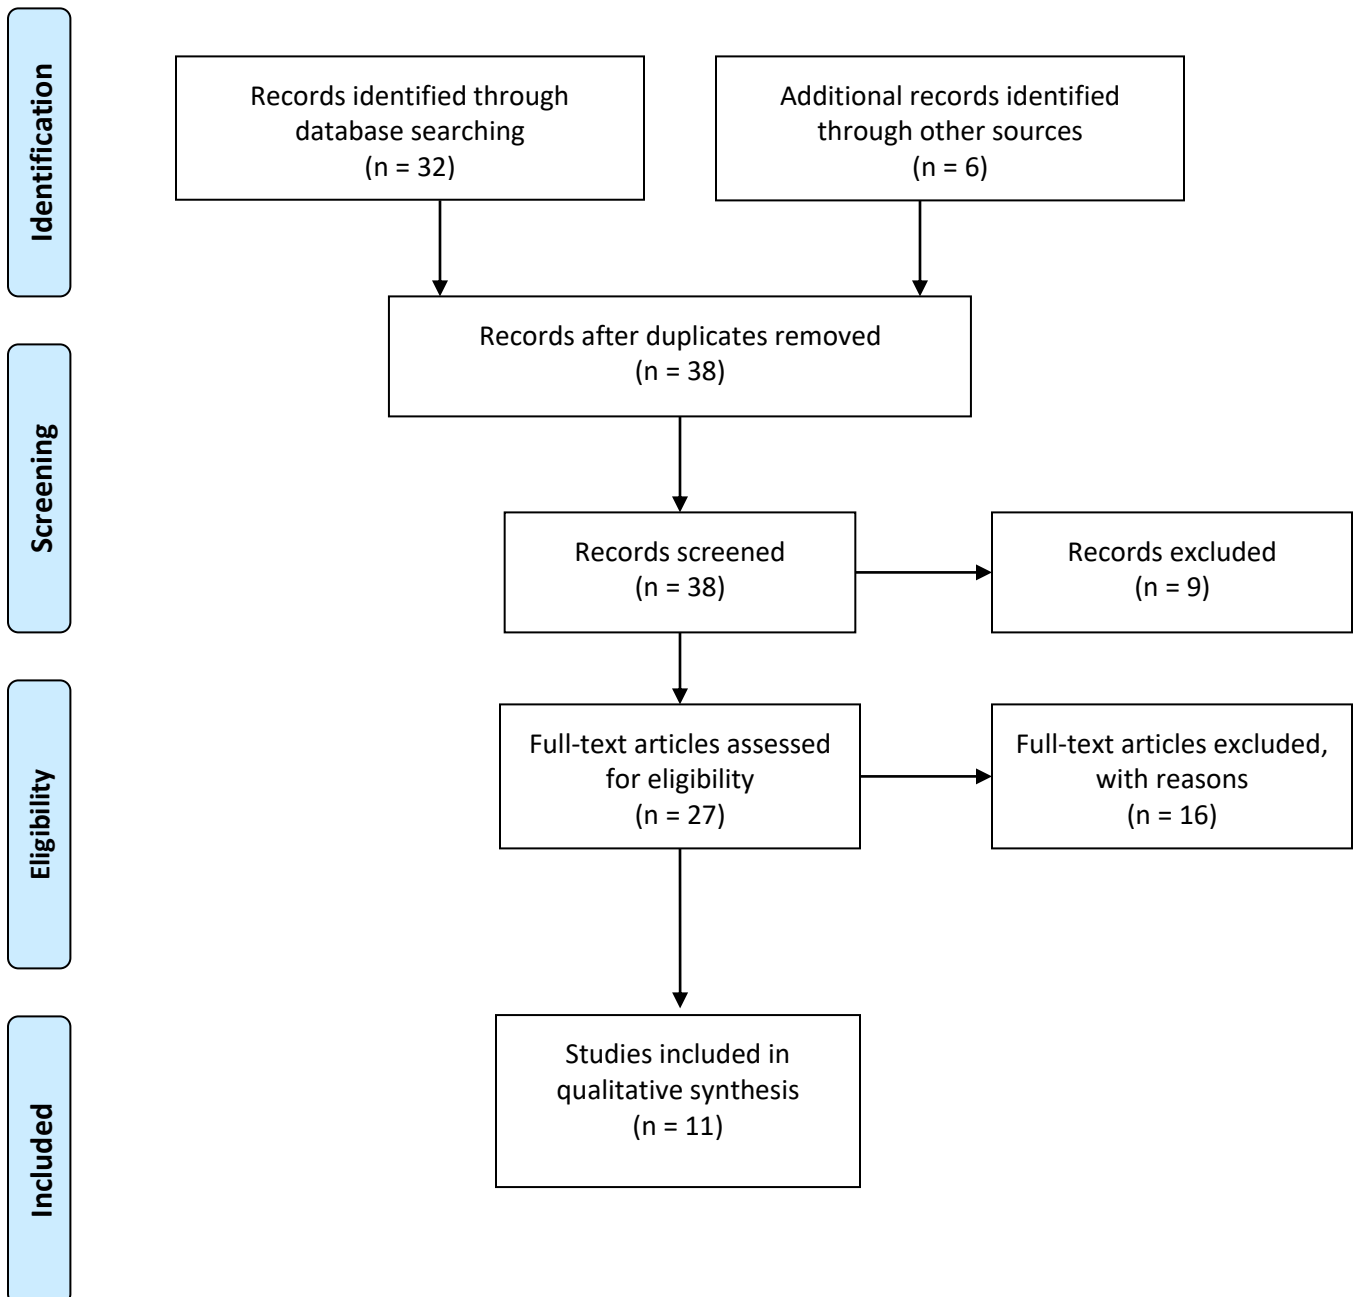

Supplement: Supplementary file 1 [file get_supplementary_file.php]
